# Supplementary material for: Reactions of vanadium(iv) and (v) with s2 metal-ion reducing centers
Source: Royal Society of Chemistry journal article supplement (doi:10.1039/b306566a), 2003-01-01
Supplement: b306566a.pdf [file b306566a.pdf]

Supplementary Material (ESI) for Dalton Transactions  
This journal is © The Royal Society of Chemistry 2003

Reactions of vanadium(IV) and  $-V$  with  $s^2$  metal-ion reducing centers

Zhiyong Yang and Edwin S. Gould

#### SUPPLEMENTARY MATERIALS

S1. Stoichiometries of reduction of vanadium(V) and  $-V$  by  $s^2$  metal centers

S2-S6 Kinetic data for redox reactions

Table S1. Stoichiometries of reduction of vanadium(V) and –(IV) by  $s^2$ -metal centers<sup>a</sup>

A. Reductions of vanadium(V)<sup>b</sup>

| Reductant           | [Red], mM | [Ox], mM | $\Delta$ [Ox], mM | $\Delta$ [Ox]/ $\Delta$ [red] |
|---------------------|-----------|----------|-------------------|-------------------------------|
| In(I) <sup>c</sup>  | 0.15      | 1.50     | 0.29              | 1.93                          |
|                     | 0.30      | 1.50     | 0.58              | 1.92                          |
|                     | 0.56      | 1.50     | 1.08              | 1.93                          |
| Ge(II) <sup>d</sup> | 0.073     | 1.00     | 0.140             | 1.92                          |
|                     | 0.147     | 1.00     | 0.28              | 1.91                          |
|                     | 0.367     | 1.00     | 0.70              | 1.91                          |
| Sn(II) <sup>d</sup> | 0.146     | 1.00     | 0.28              | 1.93                          |
|                     | 0.290     | 1.00     | 0.57              | 1.98                          |
|                     | 0.367     | 1.00     | 0.71              | 1.95                          |

B. Reductions of vanadium(IV)<sup>e</sup>

|                     |      |      |      |                   |
|---------------------|------|------|------|-------------------|
| In(I) <sup>f</sup>  | 1.93 | 9.97 | 3.95 | 2.05              |
|                     | 2.90 | 14.7 | 5.90 | 2.04              |
|                     | 3.87 | 14.7 | 7.86 | 2.03              |
| Ge(II) <sup>g</sup> | 3.00 | 14.3 | 6.25 | 2.08 <sup>h</sup> |
|                     | 3.00 | 28.7 | 6.23 | 2.08 <sup>h</sup> |
|                     | 6.00 | 57.3 | 12.1 | 2.01              |
|                     | 12.0 | 57.3 | 23.2 | 1.93              |
| Sn(II) <sup>i</sup> | 13.8 | 37.7 | 28.4 | 2.07              |
|                     | 23.0 | 56.0 | 47.8 | 2.08              |
|                     | 13.8 | 39.7 | 28.3 | 2.06 <sup>h</sup> |
|                     | 18.4 | 48.2 | 38.6 | 2.09 <sup>h</sup> |

<sup>a</sup>Reactions at 22 °C. <sup>b</sup>Added as ammonium vanadate;  $\lambda = 280$  nm. <sup>c</sup>Reactions in 0.33 M NaClO<sub>4</sub> + 0.016 M HClO<sub>4</sub>. <sup>d</sup>0.17 M HCl + 0.33 M NaCl. <sup>e</sup>Added as VO(ClO<sub>4</sub>)<sub>2</sub>;  $\lambda = 760$  nm. <sup>f</sup>HAc/Ac buffer (pH 4.70). <sup>g</sup>2.0 M HCl, [Cu<sup>2+</sup>] = 1.0 mM. <sup>h</sup>[Cu<sup>2+</sup>] = 2.2 mM. <sup>i</sup>4.0 M HCl, [Cu<sup>2+</sup>] = 1.0 mM.

Table S2. Kinetic data for reduction of vanadium(V) with tin(II)<sup>a</sup>

| [H <sup>+</sup> ], M | [Cl <sup>-</sup> ], M | [Sn <sup>2+</sup> ], mM | 10 <sup>-3</sup> k, M <sup>-1</sup> s <sup>-1</sup> <sup>b</sup> |
|----------------------|-----------------------|-------------------------|------------------------------------------------------------------|
| 0.40                 | 0.20                  | 1.25                    | 0.48 (0.44)                                                      |
| 0.40                 | 0.30                  | 1.25                    | 0.91 (0.90)                                                      |
| 0.40                 | 0.40                  | 1.25                    | 1.38 (1.42)                                                      |
| 0.40                 | 0.50                  | 1.25                    | 1.94 (1.95)                                                      |
| 0.40                 | 0.60                  | 1.25                    | 2.41 (2.47)                                                      |
| 0.40                 | 0.70                  | 1.25                    | 2.9 (3.0)                                                        |
| 0.40                 | 0.80                  | 1.25                    | 3.4 (3.5)                                                        |
| 0.40                 | 0.90                  | 1.25                    | 3.8 (3.9)                                                        |
| 0.40                 | 1.00                  | 1.25                    | 4.4 (4.4)                                                        |
| 0.50                 | 1.00                  | 1.25                    | 5.5 (5.5)                                                        |
| 0.50                 | 1.00                  | 2.50                    | 5.5 (5.5)                                                        |
| 0.50                 | 1.00                  | 5.05                    | 5.6 (5.5)                                                        |
| 0.60                 | 1.00                  | 1.25                    | 6.6 (6.6)                                                        |
| 0.70                 | 1.00                  | 1.25                    | 7.7 (7.7)                                                        |
| 0.80                 | 1.00                  | 1.25                    | 8.8 (8.8)                                                        |
| 0.90                 | 1.00                  | 1.25                    | 9.8 (9.6)                                                        |
| 1.00                 | 1.00                  | 1.25                    | 10.2 (10.6)                                                      |
| 1.00                 | 1.00                  | 1.25                    | 9.9 <sup>c</sup>                                                 |

<sup>a</sup>Reactions were carried out at 22.0 ± 0.5 °C; μ = 1.0 M (HCl/NaCl or HClO<sub>4</sub>/NaCl/NaClO<sub>4</sub>); [V<sup>V</sup>] = 0.24 mM throughout; λ = 280 nm. <sup>b</sup>Parenthetical values calculated using eq. (7) and parameters listed in Table 7. <sup>c</sup>Cu(II) (1.0 mM) added.

Table S3. The reduction of vanadium(IV) by indium(I)<sup>a</sup>

| pH   | [V(IV)], mM | [In(I)], mM | k, M <sup>-1</sup> s <sup>-1</sup> |
|------|-------------|-------------|------------------------------------|
| 1.85 | 14.7        | 2.0         | 0.88 <sup>b</sup> (0.81)           |
| 2.10 | 14.7        | 2.0         | 0.88 <sup>b</sup> (0.88)           |
| 3.62 | 14.7        | 2.0         | 3.3 (3.3)                          |
| 4.12 | 14.7        | 2.0         | 5.0 (4.7)                          |
| 4.52 | 14.7        | 2.0         | 5.5 (5.5)                          |
| 4.65 | 8.80        | 1.75        | 5.7 (5.6)                          |
| 4.65 | 14.7        | 1.75        | 5.6 (5.6)                          |
| 4.65 | 22.0        | 1.75        | 5.6 (5.6)                          |
| 4.65 | 29.3        | 1.75        | 5.5 (5.6)                          |
| 4.65 | 14.7        | 1.75        | 5.4 <sup>c</sup>                   |

---

<sup>a</sup>Reactions were run at 22.0 ± 0.5 °C, μ = 0.20 M (ClO<sub>4</sub><sup>-</sup>/acetate); λ = 760 nm; [CH<sub>3</sub>CN] = 0.13 M <sup>b</sup>H<sub>3</sub>PO<sub>4</sub>/H<sub>2</sub>PO<sub>4</sub><sup>-</sup> buffer. <sup>c</sup>[CH<sub>3</sub>CN] = 1.43 M.

Table S4 – Reduction of vanadium(IV) by germanium(II) as catalyzed by copper; kinetic data<sup>a</sup>

| [V <sup>IV</sup> ], mM | [Cu <sup>II</sup> ], mM | [H <sup>+</sup> ], M | 10 <sup>2</sup> k, M <sup>-1</sup> s <sup>-1</sup> <sup>b</sup> |
|------------------------|-------------------------|----------------------|-----------------------------------------------------------------|
| 57                     | 1.00                    | 0.50                 | 17.5 (17.6)                                                     |
| 57                     | 1.00                    | 0.83                 | 26 (25)                                                         |
| 57                     | 1.00                    | 1.33                 | 35 (35)                                                         |
| 57                     | 1.00                    | 1.67                 | 41 (42)                                                         |
| 57                     | 1.00                    | 2.00                 | 53 (49)                                                         |
| 57                     | 0.020                   | 2.00                 | 6.4 (6.7)                                                       |
| 57                     | 0.10                    | 2.00                 | 11.8 (15.2)                                                     |
| 57                     | 0.20                    | 2.00                 | 22 (22)                                                         |
| 57                     | 0.46                    | 2.00                 | 36 (33)                                                         |
| 57                     | 0.50                    | 2.00                 | 40 (34)                                                         |
| 15                     | 0.91                    | 2.00                 | 43 (46)                                                         |
| 30                     | 0.91                    | 2.00                 | 45 (46)                                                         |
| 44                     | 0.91                    | 2.00                 | 41 (46)                                                         |
| 58                     | 0.91                    | 2.00                 | 43 (46)                                                         |
| 57                     | 2.0                     | 2.00                 | 80 (69)                                                         |
| 57                     | 0                       | 2.0                  | <0.3 <sup>c</sup>                                               |

<sup>a</sup>Reactions were carried out at 22.5 ± 0.5 °C; [Ge<sup>II</sup>] = 2.5 mM; μ = 2.0 M (HCl/NaCl); λ =

760 nm. <sup>b</sup>Second order rate constants calculated from initial rates (= [rate]<sub>0</sub>/[V]<sub>0</sub>[Ge]<sub>0</sub>;

parentetical values were calculated using expression (9) and parameters listed in Table 7.

<sup>c</sup>Upper limit in 2 M HCl.

Table S5. Kinetic data for the reduction of V(IV) with excess Sn(II) as catalyzed by copper<sup>a</sup>

| [H <sup>+</sup> ]<br>(M) | [Cl <sup>-</sup> ]<br>(M) | [Cu]<br>(mM) | [Sn <sup>II</sup> ]<br>(mM) | k <sub>obs</sub> <sup>b</sup> x 10 <sup>3</sup><br>(s <sup>-1</sup> ) | [H <sup>+</sup> ]<br>(M) | [Cl <sup>-</sup> ]<br>(M) | [Cu]<br>(mM) | [Sn <sup>II</sup> ]<br>(mM) | k <sub>obs</sub> <sup>b</sup> x 10 <sup>3</sup><br>(s <sup>-1</sup> ) |
|--------------------------|---------------------------|--------------|-----------------------------|-----------------------------------------------------------------------|--------------------------|---------------------------|--------------|-----------------------------|-----------------------------------------------------------------------|
| 0.50                     | 4.0                       | 0.50         | 64                          | 0.67 (0.67)                                                           | 4.0                      | 4.0                       | 0.025        | 64                          | 0.28 (0.27)                                                           |
| 0.90                     | 4.0                       | 0.50         | 64                          | 1.25 (1.21)                                                           | 4.0                      | 4.0                       | 0.10         | 64                          | 1.11 (1.08)                                                           |
| 1.3                      | 4.0                       | 0.50         | 64                          | 1.59 (1.75)                                                           | 4.0                      | 4.0                       | 0.40         | 64                          | 4.4 (4.3)                                                             |
| 1.7                      | 4.0                       | 0.50         | 64                          | 1.90 (2.29)                                                           | 4.0                      | 4.0                       | 0.60         | 64                          | 7.0 (6.5)                                                             |
| 2.5                      | 4.0                       | 0.50         | 64                          | 2.9 (3.4)                                                             | 4.0                      | 4.0                       | 0.80         | 64                          | 8.9 (8.6)                                                             |
| 3.3                      | 4.0                       | 0.50         | 64                          | 4.0 (4.4)                                                             | 4.0                      | 4.0                       | 1.0          | 64                          | 11.0 (10.8)                                                           |
| 4.0                      | 4.0                       | 0.50         | 64                          | 5.6 (5.4)                                                             | 4.0                      | 4.0                       | 0.50         | 16 <sup>c</sup>             | 5.1 (5.4)                                                             |
| 4.0                      | 0.30                      | 0.50         | 64                          | 3.4 (3.9)                                                             | 4.0                      | 4.0                       | 0.50         | 32 <sup>c</sup>             | 5.0 (5.4)                                                             |
| 4.0                      | 0.50                      | 0.50         | 64                          | 4.8 (4.2)                                                             | 4.0                      | 4.0                       | 0.50         | 64 <sup>c</sup>             | 5.2 (5.4)                                                             |
| 4.0                      | 0.90                      | 0.50         | 64                          | 5.5 (4.6)                                                             | 4.0                      | 4.0                       | 0.50         | 128 <sup>c</sup>            | 5.3 (5.4)                                                             |
| 4.0                      | 2.5                       | 0.50         | 64                          | 6.6 (5.2)                                                             |                          |                           |              |                             |                                                                       |
| 4.0                      | 3.2                       | 0.50         | 64                          | 5.9 (5.3)                                                             |                          |                           |              |                             |                                                                       |

<sup>a</sup>Reactions run at 22 ± 0.5 °C, μ = 4.0 M (HCl/NaCl; or NaCl/HClO<sub>4</sub>/NaClO<sub>4</sub>), λ = 760 nm, [V<sup>IV</sup>] = 5.0 mM unless otherwise indicated. <sup>b</sup>Parentetical values calculated using expression (10) and kinetic parameters in Table 7. <sup>c</sup>[V<sup>IV</sup>] = 5.0 mM.

Table S6. The reduction of Cu(II) with Sn(II) at high [Cl<sup>-</sup>]<sup>a</sup>

| [H <sup>+</sup> ], M | 10 <sup>-2</sup> k, M <sup>-1</sup> s <sup>-1</sup> |
|----------------------|-----------------------------------------------------|
| 0.80                 | 1.84 ± 0.10                                         |
| 1.60                 | 3.9 ± 0.2                                           |
| 2.40                 | 4.5 ± 0.3                                           |
| 4.0                  | 7.1 ± 0.6                                           |

<sup>a</sup>Reactions carried out at 23 °C, λ = 880 nm, μ = 4.0 M (HCl/LiCl); [Sn<sup>II</sup>] = 23.0 mM; [Cu<sup>II</sup>] = 4.1 mM.
